1 Early Holocene Morphological Variation in Hunter-Gatherer Hands and Feet

2  
3 Kara C. Hoover<sup>1\*</sup>

4 J. Colette Berbesque<sup>2</sup>

5  
6 <sup>1</sup>Department of Anthropology, University of Alaska Fairbanks, Fairbanks Alaska USA,  
7 kchoover@alaska.edu

8 <sup>2</sup>Centre for Research in Evolutionary, Social and Inter-Disciplinary Anthropology,  
9 University of Roehampton, London UK Colette.Berbesque@roehampton.ac.uk

10  
11 \*Corresponding author

12  
13 Running title: Hunter-Gatherer Hands and Feet

14  
15 Key words: carpal, tarsal, lateralization, hunter-gatherer morphology, Early Archaic, sex-  
16 based division of labor, Windover

17  
18 **Abstract**

19 The Windover mortuary pond dates to the Early Archaic period (6,800-5,200 years ago)  
20 and constitutes one of the earliest archaeological sites with intact and well-preserved  
21 human remains in North America. Unlike many prehistoric egalitarian hunter-gatherers,  
22 the Windover people did not practice a sex-based division of labor, rather they shared the  
23 load. We explore how mobility and subsistence, as reconstructed from archaeological  
24 data, influenced the morphology of hand and foot bones of this population. Using length-  
25 width ratios to account for trait size and taking the natural log of the ratio to account for  
26 sexual dimorphism, we analyzed 10 variables (4 carpal and 6 tarsal). We identified  
27 differences in the rear-and midfoot regions that suggest the Windover occupation was  
28 engaging in heavy impact mobility. In particular, females exhibit greater variation and  
29 higher mean averages than males for size of shock-absorbing bones. We identified sex-  
30 based differences in carpal bones, with females exhibiting greater variation and higher  
31 mean ratios in most variables compared to males. Despite widespread behavioural  
32 evidence on contemporary populations for human lateralization for hands and feet, we  
33 found no evidence of either handedness or footedness in Windover. The lack evidence for  
34 footedness was expected due its minimal impact on walking gait but the lack of evidence  
35 for handedness is surprising given that modern ethnographic studies have shown strong  
36 handedness in hunter-gatherers during tool and goods manufacture. If the archaeological  
37 evidence for a shared division of labor is true, we have potentially uncovered evidence  
38 for a heavier activity load in females.

## 39 1.INTRODUCTION

40

41 A sex-based division of labor is seen across most human societies for the majority of  
42 evolutionary history and contributes to size-based morphological variation between the  
43 sexes [1] [2]. The wealth of ethnographic data on extant hunter-gatherers provides  
44 insights into activities ascribed to each of the sexes. Applying what we know about extant  
45 hunter-gatherer behavior to the bioarchaeological record, we can link muscular-skeletal  
46 markers to habitual activities. Physical markers of activity include geometric variation in  
47 bone structure and function due to biomechanical loading [3], diaphyseal structure [4-8],  
48 degenerative joint disease (DJD), osteoarthritis, muscular-skeletal markers (MSM) [9],  
49 and dental wear patterns relative to tool manufacture [10, 11].

50

### 51 1.1 Mobility Activity

52 Hunter-gatherer mobility can be described as residential (moving camp to a new location  
53 as in seasonal occupation of resource rich areas) and logistical (individuals and/or smaller  
54 groups temporarily split from the main group for shorter foraging trips or longer hunting  
55 trips) [12, 13]—this is particularly true for mobile hunter-gatherers that specialize in  
56 terrestrial resources [14-16]. There is some evidence for sex-based variation in hunter-  
57 gatherer mobility; modern Hadza hunter-gatherer males engage in greater daily walking  
58 distances at faster speeds than females [17, 18].

59

60 Distal limbs have been implicated to a greater degree than upper limbs in reflecting  
61 habitual activity due to the biomechanical forces arising from locomotive substrate (i.e.,  
62 terrains on which activities are conducted), distances travelled in a day, and relative  
63 speed of locomotion [7, 9, 17-30]. Of interest to this study is how biomechanical stress  
64 from mobility and footedness might affect the tarsals. The ground reaction force  
65 generated by the bare (or minimally shod) foot contacting the ground is transmitted  
66 through the subtalar skeleton, with peak forces at heel-strike through the calcaneus and at  
67 heel-off through the metatarsophalangeal articulations [31]. Thus, during normal  
68 locomotion, the typical bipedal heel strike transmits body mass from the tibia to the rear  
69 foot (talus and calcaneus) to the ground [32] while the shock of impact is absorbed by the  
70 midfoot (navicular, cuboid, and cuneiform bones) [32]. The calcaneus is most affected by  
71 the rear heel strike and calcaneal tuber length (as a proxy for Achilles tendon moment  
72 arm length) is correlated with running economy (long calcaneal tuber = greater energy  
73 cost) [33] Most data from extant hunter-gatherers [30, 34] and barefoot populations  
74 suggest a rear heel strike [35] is preferred among experienced runners. Dorsal spurs on  
75 the calcaneus are linked to increased activity while plantar spurs are linked to standing,  
76 inactivity, and excess weight [27]. While footedness in humans develops in late  
77 childhood (11-12 years old) with a right skew [36, 37], its influence on walking gait is  
78 not significant and is unlikely to affect the muscular-skeletal system in the absence of  
79 other evidence of lateralization [38]. Thus, regions of the foot may be differential shaped  
80 by daily logistical mobility that emphasizes either slow walking and stationary weight-  
81 bearing activity (such as might occur when foraging) or rapid locomotion such as brisk  
82 walking or running that requires greater shock absorption. And, if subsistence based  
83 activities are assigned via sex [2, 6], there may be sex-differences in how these regions of  
84 the feet vary.

85

## 86 **1.2 Domestic economies**

87 Domestic economies include subsistence and tool manufacture, which supports  
88 subsistence activities. Subsistence covaries with biological factors (e.g., habitat,  
89 reproduction, health) and cultural factors (e.g., social organization, sedentism, mobility).  
90 A comprehensive analysis of 229 hunter-gatherer diets, eco-environmental data, and  
91 plant-to-animal dietary ratios found that most populations consume similar amounts of  
92 carbohydrates (30-35% of the diet) except in more extreme environments (i.e., increases  
93 in desert and tropical grasslands and decreases in higher latitudes) [39]. Indeed, there is a  
94 strong clinal pattern of variation in male and female caloric contributions to diet.  
95 Subsistence contributions by sex are inversely correlated with effective temperature, a  
96 combined measure of the intensity and annual distribution of solar radiation [12, 40].  
97 Higher latitudes and colder climates rely more on male caloric contributions from big  
98 game hunting while temperate and tropical regions rely more heavily on female caloric  
99 contributions across the spectrum (e.g., small game, fishing, and plants) [39]. In general,  
100 males tend to increase foraging activities in more stable productive habitats [41] and  
101 females tend to decrease labor in subsistence activities when males are hunting big game  
102 (focusing instead on activities like weaving and cordage) [42].

103

104 Ethnographic data indicate that domestic economies such as tool making, child care and  
105 carrying, butchering/food preparation, textiles, and carrying firewood and water create  
106 physical strain [14, 43-45]. Increased reliance on tools is linked to evolutionarily more  
107 gracile bodies [46] but tool manufacturing and use are detectable on the body through  
108 increased upper limb robusticity [25] and lateralization, or side preference [47].  
109 Unimanual activities (e.g., spear use) leave a distinct mark of directional asymmetrical in  
110 the upper limbs compared to bimanual activities such as grinding or rowing [48]. Indeed,  
111 extant hunter-gatherers exhibit strong hand preference specifically when making and  
112 using tools [49, 50] which suggests mosaic progression to extreme lateralization we see  
113 in modern populations [47]. And, there is evidence in the archaeological record of  
114 sidedness varying between the sexes [22, 51]. While domestic economies vary across  
115 groups, they tend to be sex-based and more frequently involve lateralized repetitive stress  
116 compared to subsistence and mobility [48]. Thus, bioarchaeological evidence of  
117 subsistence activities and tool manufacture may found in repetitive stress to the musculo-  
118 skeletal system and result in lateralized MSM, DJD, and osteoarthritis of the limbs  
119 involved. Carrying loads may place additional weight-bearing biomechanical stress on  
120 the foot and the domestic economies may serve to differentiate the wrists.

121

## 122 **1.3 Aims**

123 The focus of this paper is to explore whether or not logistical mobility and domestic  
124 economies (subsistence and tool manufacture) are archaeologically visible in the feet  
125 (tarsals) and hands (carpals) and, if so, whether or not they reflect a sex-based division of  
126 labor. Much attention has been paid to sexual dimorphism in carpal and tarsal elements in  
127 forensic contexts and with applications to sexing skeletons in bioarchaeology; these  
128 studies have had varied success with most pointing to the calcaneus and sometimes talus  
129 as the most diagnostic elements [52-64]—for a review see [65]. Carpals and tarsals were  
130 chosen for this study for two reasons. First, they are heavily implicated in the daily

131 activities of hunter-gatherers (e.g., mobility, use of weapons, tool-making, domestic  
132 economies). Second, they are less likely to be influenced by the noise created from  
133 conflicting signals of genetics and lifestyle that obfuscates differentiation of ultimate and  
134 proximate causes of variation that plagues the long bones [21]. Third, dense and small  
135 bones, such as carpals and tarsals, are among the better-preserved elements in the human  
136 body (Henderson 1987; Mann 1981; Waldron 1987) and if daily activities are visible in  
137 these elements, we are potentially able to capture data that might otherwise be lost in less  
138 well-preserved skeletons.

139  
140 We examined carpal and tarsal data from the Florida Early Archaic Windover Site which  
141 contains the remains of a population of hunter-gatherers experiencing a major climate  
142 change in North America and, along with it, a change in domestic economies. Warmer  
143 climate was driving big game north and broad-spectrum foraging was emerging as the  
144 primary subsistence economy, de-emphasizing the dietary contribution of males and  
145 increasing the contributions of females. We generated research questions based on  
146 general cross-cultural patterns identified in hunter-gatherers (Section 1) and specific  
147 patterns identified at the Windover Site (Section 2). As such, research questions are  
148 placed at the end of Section 2.

## 149 150 **2. MATERIALS (BIOARCHAEOLOGICAL CONTEXT)**

151  
152 The Windover mortuary pond archaeological site (8BR46) is a National Historic  
153 Landmark dating to the Early Archaic Period (7500-5000 BCE) with calibrated radio-  
154 carbon dates from 9000 to 7929 BP. In general, the North American Archaic Period  
155 (8000 to 1000 BC) is characterized by hunting-gathering subsistence economies with  
156 dietary staples including nuts, seeds, and shellfish [66]. The Florida Archaic Period  
157 follows the same pattern (e.g., broad spectrum hunting, fishing, and plant gathering and  
158 use of freshwater resources) with increased exploitation of coastal shellfish and marine  
159 resources. The comparatively wetter climate [67] created an abundance of resources and  
160 and subsistence strategies were no longer dominated by big game. The broad spectrum  
161 foraging strategy that emerged is reflected in more complex tool kits [66, 68].

162  
163 Windover was used as a mortuary pond with 5-6 short periods of activity, peaking at  
164 7450 BP [68]. Burials furthest from the pond edge at time of excavation dated to the  
165 earliest period of mortuary pond use and those closest, more recent. Roughly 100 burials  
166 were undisturbed with fully articulated bones; ages ranged from infancy to over sixty-  
167 five, with 52% classified as subadults [69]. Most individuals were buried within 24 to 48  
168 hours after death (Doran 1992; Dickel 1988, Hauswirth 1991) in a flexed position, on the  
169 left side with heads oriented to the west, and pinned by sharpened stakes approximately  
170 1m below the surface of the peat [70]. The nearly neutral pH of the pond (6.1-6.9) created  
171 ideal conditions for preservation of both skeletal and soft tissues; allowing researchers to  
172 sequence DNA from preserved brain matter [70], reconstruct diet from preserved  
173 stomach contents [71], and study textile industries [72]. The population exhibited  
174 predominantly good health and included individuals of extremely advanced age (50+) for  
175 hunter-gatherer groups which reflects local resource abundance [73] and medical  
176 practices [71, 74-77]. Common to hunter-gatherer populations, adults of both sexes

177 exhibited a high incidence of osteoarthritis [78], frequent enamel defects [79, 80], and  
178 skeletal trauma [76]. Overall, female health was worse than males [77, 81]

179

## 180 **2.1 Mobility**

181 The bog was strategically located between the Indian River coastal lagoon system and the  
182 St. John's River, an area rich in marine, fresh water, and terrestrial resources, which  
183 indicates that the population did not have to travel long distances between seasons [74]  
184 and did not fission into smaller groups between visits to the pond [77]. Seasonal mobility  
185 is indicated by analysis of preserved stomach contents which were from plants and fruits  
186 maturing during July and October. In addition, growth ring data recovered from mortuary  
187 stakes indicated the wood was harvested in late summer/early fall [82]. Ultimately,  
188 however, the residential mobility of the Windover population was limited to a  
189 constrained geographic area around the bog with most evidence pointing to emergence of  
190 sedentism [77].

191

## 192 **2.2 Subsistence economies**

193 Paleodietary analysis from carbon and nitrogen bone-collagen values and  
194 archaeobotanical information suggest exploitation of riparian resources rather than the  
195 more common Florida Archaic use of marine mammals or terrestrial fauna such as deer  
196 or rabbit [71]. Males and females did not have significantly different isotope values for  
197 major dietary components [77, 81]. Based on ethnographic data, the resource rich  
198 environment fostered by a milder wetter climate suggests greater reliance on female  
199 caloric contributions to diet [39] and this is supported by grave goods--both males and  
200 females were found with materials for hunting small mammals, reptiles, and fish [75].  
201 There is evidence of some specialization because only male graves atlatl components,  
202 spears, lithic projectiles, and hollow point awls (for making fishing nets) and only  
203 females and subadult graves contained direct evidence for food processing (e.g.,  
204 butchered bone, mortar and pestle, containers) [72, 75].

205

## 206 **2.3 Tool economies**

207 Analysis of tools found amongst the grave goods suggests tool material choice (not type)  
208 was sex-based; females preferred organic materials (e.g., shell, carapace) while males  
209 preferred antler bone [74, 75]. Few tool types were exclusive to one sex which suggests  
210 few activities were specific to one sex [75]. Females also tended to have more decorative  
211 items [75] and were found exclusively with materials for plant-based medicine [71, 74,  
212 75]. Interestingly, stone tools only play a cameo in the story of tools at Windover [74]  
213 while female goods (textiles, baskets, containers, medicines) have a starring role across  
214 the history of the pond. The absence of internment with stone tools suggests a cultural  
215 emphasis on the labor of women and products from both men and women in the domestic  
216 economy rather than an emphasis on male big-game hunting [74]. This may be an  
217 outcome of climate change [66, 68] rapidly altering domestic roles from the Paleoindian  
218 to the Early Archaic periods.

219

## 220 **2.4 Activity Reconstruction**

221 DJD at Windover has been analyzed in two separate studies [78, 83] using different  
222 methods but both finding high rates of DJD consistent with prehistoric hunter-gatherer

223 lifestyles [78, 83]. DJD frequency in the cervical spine is particularly high in females and  
224 may be explained by food or palm leaf (for textile fibers) processing activities [83] or  
225 carrying heavy loads [78] both of which are supported by grave good evidence [72, 74,  
226 75]. Males exhibit greater DJD in the lumbar region which they were carrying heavy  
227 loads (perhaps game or goods during seasonal camp relocation) or stressed from  
228 repetitive motions related to hide processing [83]. Elbows were commonly affected  
229 which might be interpreted as male atlatl throwing but females exhibited more DJD in  
230 wrist elbows and shoulders than males [83] which suggests a shared activity [78]. Wrists  
231 exhibited little evidence of DJD (3/97 left and right wrists affected) but females had more  
232 hand trauma [83] and males had a higher frequency of severe DJD in both hands (18% of  
233 the sample) [78]. Significant bilateral degeneration of talar-calcaneal articular facets was  
234 noted in 37% of individuals [78], which might reflect high mobility [27], possibly  
235 running [33, 35, 84, 85]. There were some overall sex-based patterns in DJD with males  
236 exhibiting more knee and hip damage on the left and females exhibiting more severe  
237 change on the right [78], which might suggest footedness and increased mobility in males  
238 with more shock to the feet.

239  
240 An examination of muscle insertion sites [86] found low levels of habitual stress  
241 (indicative of stressful repetitive activity) but muscle insertion sites were fairly robust. As  
242 with the DJD results, there is much overlap between the sexes in scores further  
243 supporting the notion that most activities were shared. The lack of asymmetry in MSM,  
244 particularly in males due to the use of the atlatl, suggests a lack of repetition in this  
245 activity or other activities which exert symmetrical force on the upper limbs and obscure  
246 the lateralization of spear-throwing—possibly kayaking [86]. Analysis of fractures  
247 suggests interpersonal violence (affecting male crania and, less frequently, the post  
248 cranial skeleton) but the majority of trauma came from accidents with females slightly  
249 more affected than males. Ribs (often on the right side) were the most fractured in both  
250 sexes with ulnar fractures in second place. The vertebra exhibit evidence of compression  
251 fractures (more frequent in females and equal to ulna fractures in incidence) consistent  
252 with falls when landing in an upright position or carrying heavy loads. Overall, fracture  
253 patterns suggest accidents related to logistical mobility in the uneven intercoastal terrain  
254 and heavy underbrush [76].

255

## 256 **2.5 Research Questions**

### 257 1. Mobility

258 a) Are there differences between weight-bearing and shock absorbing tarsals as  
259 suggested by previous research indicating heavy load carrying and high  
260 mobility or running?

261 b) Is there asymmetry in tarsals as suggested by asymmetrical DJD in lower  
262 limbs and fracture patterns?

### 263 2. Subsistence

264 a) Is there a between-sex difference in carpal bones based on previous research  
265 showing greater hand trauma and domestic economy production in females?

266 b) Is there asymmetry in carpal bones reflecting handedness in complex tasks for  
267 making tools and textiles?

268

269 **3. METHODS**

270

271 Carpal and tarsal elements with standard anatomical reference points intact were included  
 272 from adults with well-defined features used in sex assessment (given the focus on sex-  
 273 based morphological variation) resulting in a sample of 44 (27 males, 17 females), but  
 274 sample size varies by measurement. All measurements were taken on right and left sides,  
 275 when available. Length and width were measured on four carpal bones, four tarsal bones,  
 276 and the weight-bearing areas of the talus (trochlea) and calcaneus (load arm). Raw data  
 277 were explored for significant outliers using Grubb’s statistic.

278

279

**Table 1: Measurements**

| Element           | Measurement              | Orientation      | Description                                           |
|-------------------|--------------------------|------------------|-------------------------------------------------------|
| Scaphoid          | Length                   | proximal         | scaphoid tubercle-lateral most point                  |
|                   | Width                    | palmar<br>medial | bisection of scaphoid ridge                           |
| Capitate          | Length                   | palmer           | proximal-distal end                                   |
|                   | Width                    | lateral          | thinnest point                                        |
| Lunate            | Length                   | proximal         | proximal-distal end                                   |
|                   | Width                    | proximal         | medial-lateral sides                                  |
| Hamate            | Length                   | lateral          | proximal end-distal ridge (between metacarpal facets) |
|                   | Width                    | lateral          | most medial to most lateral side of the facet         |
| Calcaneus         | Length                   | lateral          | (Steele and Bramblett 1988)                           |
|                   | Width                    | superior         | (Steele and Bramblett 1988)                           |
|                   | Load arm length          | superior         | (Steele and Bramblett 1988)                           |
|                   | Load arm width           | superior         | (Steele and Bramblett 1988)                           |
| Talus             | Length                   | superior         | (Steele and Bramblett 1988)                           |
|                   | Width                    | superior         | (Steele and Bramblett 1988)                           |
|                   | Trochlea tibia<br>length | superior         | (Steele and Bramblett 1988)                           |
|                   | Trochlea tibia<br>width  | superior         | (Steele and Bramblett 1988)                           |
| Navicular         | Length                   | distal           | medial tuberosity to lateral cuneiform facet          |
|                   | Width                    | inferior         | between intermediate and medial cuneiform facets      |
| Int.<br>Cuneiform | Length                   | superior         | proximal and distal midpoint                          |
|                   | Width                    | superior         | thickest middle portion                               |

280

281 There are two major methodological concerns for this size-based morphological study:  
 282 sexual dimorphism [87-89] and trait size variation [90, 91]. The inherent difference  
 283 between two variables may be confounded by relative difference in size—comparing the  
 284 intermediate cuneiform to the talus or comparing male to female. A common resolution  
 285 to sexual dimorphism in size-based studies is to take a ratio of two variables, such as  
 286 length and width [87-93]. The issue of trait size variation is one common to asymmetry  
 287 studies [94-96] and often resolved by scaling data to the natural log [92, 95]. The natural  
 288 log of ratio dataset is symmetric, homoscedastic, and retains the original linear scale of  
 289 standard deviation to the mean (the spread or variation of the data) [97]. Thus, we have

290 taken the natural log,  $\log_n$ , of the absolute value of length-to-width ratio,  $L:W$ , per bony  
291 element,  $x$ :

292  $\log_n|x(L:W)|$

293 This resulted in a total of four carpal variables (capitate, hamate, lunate, scaphoid) and  
294 six tarsal variables (calcaneus, calcaneus load arm, intermediate cuneiform, navicular,  
295 talus, talus, trochlea tibia). These data are included as Supplementary Tables 1 and 2.

296

297 Log transformed ratio data were tested for the normal distribution. A two-way (sex by  
298 class) univariate General Liner Model (GLM) assessed differences between tarsal classes  
299 (weight bearing, shock absorbing). A multivariate GLM assessed differences in carpal  
300 bones. A two-way (sides by individual) univariate GLM was used to assess the presence  
301 of directional asymmetry in both tarsal and carpal bones [94-96]. All results were  
302 evaluated relative to confidence intervals, power, and estimated effect size.

303

#### 304 4. RESULTS

305

306 Outliers identified by Grubb's statistic were inspected and removed if determined to be  
307 data entry error. Extreme values not identified as outliers were retained. Data were  
308 transformed to mitigate the confounding effect of trait size and sexual dimorphism as  
309 previously described. All variables were normally distributed (Supplementary Table 3).  
310 Descriptive data for all variables by sex are found in Supplementary Table 4.

311

312 Are there differences between weight-bearing and shock absorbing tarsals as suggested  
313 by previous research indicating heavy load carrying and high mobility or running?  
314 Exploratory analysis suggested that females have larger shock-absorbing bones than  
315 males and shock-absorbing bones were larger than weight-bearing bones (Figure 1, left).  
316 The two-way univariate GLM (Levene=001,  $p=1.00$ ) indicated no significant between-  
317 sex difference or interaction between sex and bone class but the statistical significance  
318 for differences between shock-absorbing and weight-bearing tarsals is high (Table 2,  
319 Figure 1, right).

320

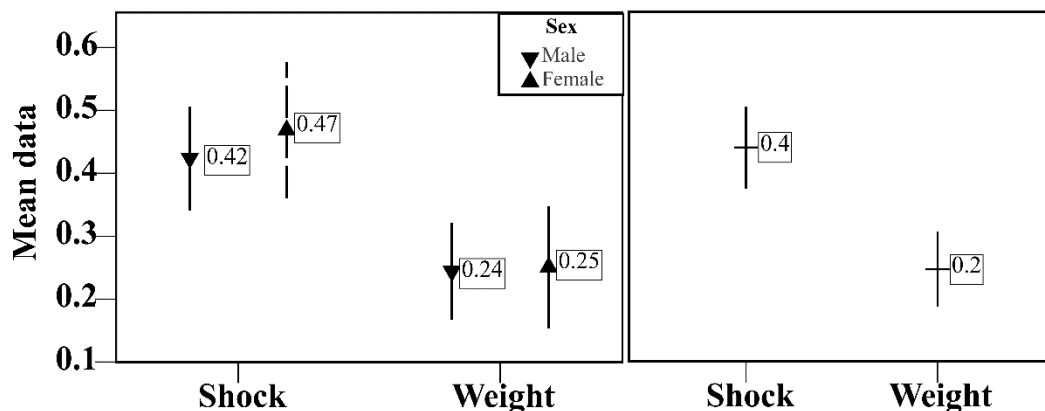

321

322 **Figure 1: Confidence intervals for weight-bearing and shock absorbing mean pooled**  
323 **sex (left) and by sex (right)**

324

325 **Table 2: Univariate GLM Analysis of Tarsal Scaled Ratio Data**



| Test     | F      | df | Sig  | $\eta p$ | Power |     | Mean | SE   | n   | 95% CI |       |
|----------|--------|----|------|----------|-------|-----|------|------|-----|--------|-------|
|          |        |    |      |          |       |     |      |      |     | Lower  | Upper |
| Sex(S)   | 1.83   | 1  | 0.41 | 0.65     | 0.09  | M   | 0.33 | 0.03 | 237 | 0.27   | 0.39  |
|          |        |    |      |          |       | F   | 0.36 | 0.04 | 142 | 0.28   | 0.44  |
| Class(C) | 108.06 | 1  | 0.06 | 0.99     | 0.59  | S   | 0.45 | 0.04 | 129 | 0.37   | 0.53  |
|          |        |    |      |          |       | W   | 0.25 | 0.03 | 250 | 0.19   | 0.31  |
| S*C      | 0.14   | 1  | 0.71 | 0.00     | 0.07  | S-M | 0.42 | 0.05 | 82  | 0.33   | 0.52  |
|          |        |    |      |          |       | W-M | 0.24 | 0.04 | 155 | 0.17   | 0.52  |
|          |        |    |      |          |       | S-F | 0.47 | 0.07 | 47  | 0.34   | 0.60  |
|          |        |    |      |          |       | W-F | 0.25 | 0.05 | 95  | 0.16   | 0.34  |

326

327 Is there asymmetry in tarsals as suggested by asymmetrical DJD in lower limbs and  
 328 fracture patterns? The two-way univariate GLM did not indicate any lateralization of the  
 329 foot bones, or 'footedness' and no further testing was indicated (Supplementary Table 5).  
 330

331 Is there a between-sex difference in carpal bones based on previous research showing  
 332 greater hand trauma and domestic economy production in females? Exploratory plots  
 333 (Figure 2) show that females have larger carpal ratios than males except for the hamate.  
 334 Results of a multivariate GLM suggest potentially significant differences between the  
 335 sexes (Pillai's Trace  $F=2.811$ ,  $p=0.059$ ,  $\eta p=0.0.398$ ). The univariate individual tests  
 336 generated by the multivariate GLM (Table 3) suggest the lunate and scaphoid contribute  
 337 most to the potentially significant differences. The visualization of 95% confidence  
 338 intervals (Figure 3) indicates that females have greater ranges that encompass most male  
 339 values.  
 340

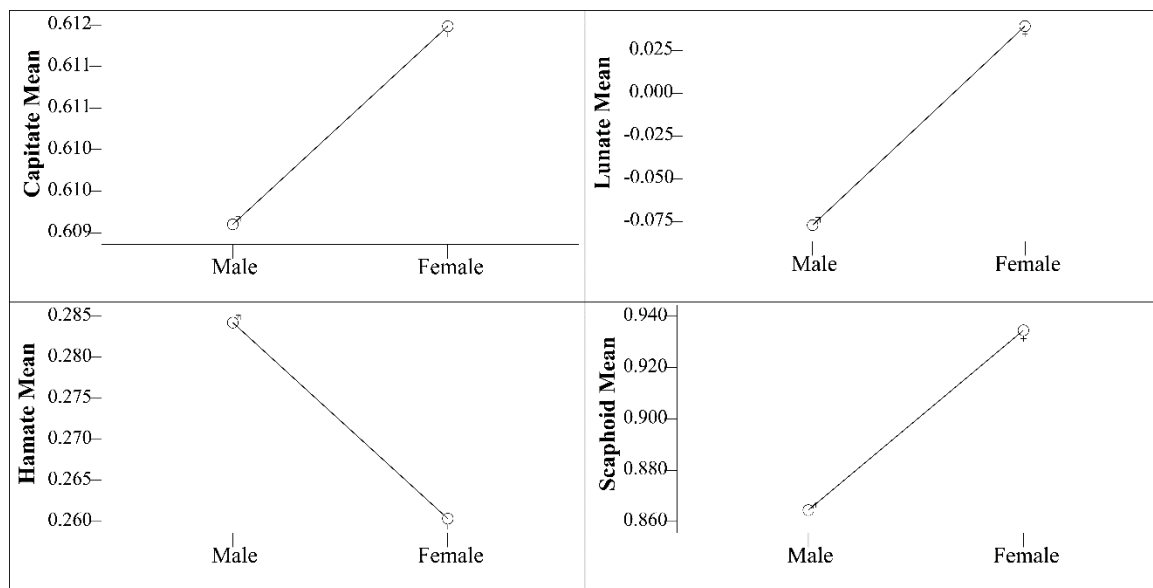

341

342 **Figure 2: Means plots for carpals**

343

344 **Table 3: Multivariate GLM Analysis of Carpal Ratio Scaled Data**

| Levene | Sig | F | df | Sig | $\eta p$ | Power | Mean | SE | n | 95% CI |       |
|--------|-----|---|----|-----|----------|-------|------|----|---|--------|-------|
|        |     |   |    |     |          |       |      |    |   | Lower  | Upper |

|   |      |      |      |   |      |      |      |   |       |      |    |       |       |
|---|------|------|------|---|------|------|------|---|-------|------|----|-------|-------|
| A | 3.22 | 0.09 | 2.85 | 1 | 0.11 | 0.13 | 0.36 | M | 0.60  | 0.02 | 28 | 0.56  | 0.63  |
|   |      |      |      |   |      |      |      | F | 0.65  | 0.02 | 21 | 0.60  | 0.70  |
| B | 2.15 | 0.16 | 1.11 | 1 | 0.31 | 0.05 | 0.17 | M | 0.28  | 0.02 | 21 | 0.24  | 0.32  |
|   |      |      |      |   |      |      |      | F | 0.25  | 0.02 | 14 | 0.20  | 0.30  |
| C | 4.32 | 0.05 | 2.71 | 1 | 0.12 | 0.12 | 0.35 | M | -0.08 | 0.03 | 27 | -0.15 | -0.01 |
|   |      |      |      |   |      |      |      | F | 0.01  | 0.04 | 20 | -0.08 | 0.10  |
| D | 0.22 | 0.64 | 1.10 | 1 | 0.31 | 0.05 | 0.17 | M | 0.85  | 0.03 | 22 | 0.79  | 0.92  |
|   |      |      |      |   |      |      |      | F | 0.91  | 0.04 | 19 | 0.82  | 1.00  |

345 <sup>1</sup>A-Capitate; B-Hamate; C-Lunate; D-Scaphoid

346 <sup>2</sup>M, male; F, female

347

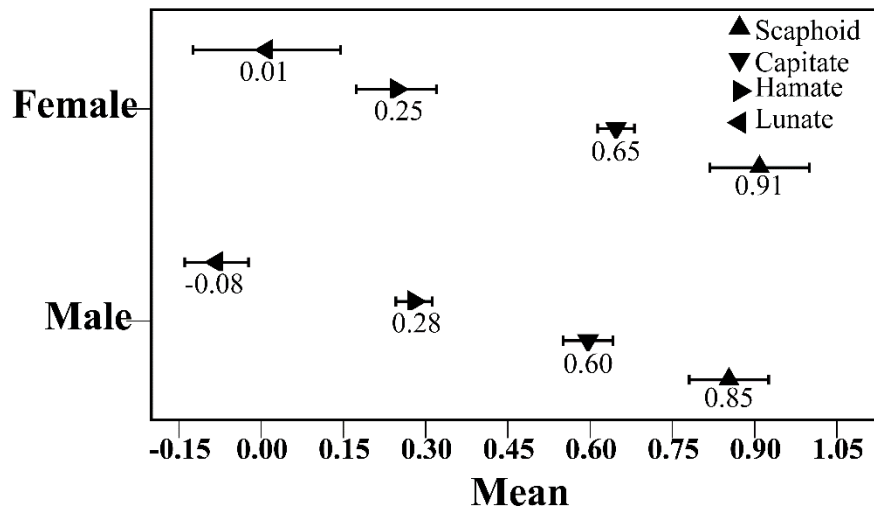

348

349 **Figure 3: Carpal ratio scaled data 95% confidence intervals by sex**

350

351 Is there asymmetry in carpal bones reflecting handedness in complex tasks for making  
 352 tools and textiles? The two-way univariate GLM did not indicate any lateralization of the  
 353 hand bones, or ‘handedness’ and no further testing was indicated (Supplementary Table  
 354 5).

## 355 5. DISCUSSION

356 Archaeological data reconstructing the environment surrounding the mortuary pond  
 357 suggest that the larger region of the Windover population was rich with riparian and  
 358 terrestrial resources due to climate warming at the start of the Early Archaic. As  
 359 megafauna distributions increased in latitude, Windover subsistence strategies  
 360 increasingly relied less on big-game hunting more on broad spectrum foraging [67, 82].  
 361 Grave good analysis and activity reconstructions suggest heavy overlap between the  
 362 sexes in domestic economies rather than a strict sex-based division of labor [75-78, 86].

### 363 5.1 Tarsal Variation

364 Based on previous analysis, we speculated whether load carrying might influence  
 365 differences between weight-bearing and shock absorbing tarsals. A univariate two ways  
 366 (sex by class) GLM indicated no significant between-sex differences or significant  
 367 interaction between sex and class (shock-absorbing, weight-bearing). The power for both

368 these tests is extremely low and confidence interval data suggests there may be a  
369 statistically undetected significant between-sex difference. This potential difference is not  
370 consistent with sexual dimorphism because shock-absorbing bone summary data suggest  
371 higher female mean ratios and a greater range than males while the weight-bearing bone  
372 summary data suggest no differences (same mean, females contained within the male  
373 interval). This female specific pattern is reflected in the results of the pooled sex test for  
374 difference between weight-bearing and shock absorbing bones. Reaching the threshold  
375 for statistical significance was likely prevented by the observed power (59%) which  
376 likely was not high enough to capture the difference. Thus we feel confident in  
377 interpreting these results as biological significant. Females have larger mean ratios for  
378 shock-absorbing bones than males. We expected the reverse in both sexes—greater stress  
379 on weight-bearing tarsals (talus and trochlea, calcaneus and load arm) due to heavy load-  
380 carrying, as evidenced by the increased bilateral degeneration of the talar-calcaneal  
381 articular surfaces [78], cervical DJD in females [78], and presence of lumbar DJD in  
382 males [78]. The rate of fractures attributed to accidents suggested high mobility in a  
383 rough terrain (which certainly describes intercoastal regions) and our results may reflect  
384 this as well.

385  
386 Clinical evidence of the effect on the foot due to barefoot walking and running during  
387 growth and development suggests it lengthens the foot at the expense of width and  
388 flattens the arches [35, 84, 85]—this is true even when controlling for potentially  
389 confounding effects of demographic variation [84]. The navicular is a key stone bone in  
390 the arches of the foot that is impinged during foot strike by the talus and other  
391 cuneiforms. Structurally linking the rear- and mid-foot, it bears the transmission force of  
392 weight during the push-off phase of locomotion and experiences highly localized stress in  
393 middle one-third of the bone, which makes it prone to fracture in highly athletic  
394 individuals [98-101]. Anatomically, the intermediate cuneiform articulates with the  
395 navicular proximally and second metatarsal distally. The second metatarsal-intermediate  
396 cuneiform joint is a highly stable key stone joint with limited mobility. Injury to the joint  
397 occurs via direct force from load applied to the base of the foot or indirect forces from a  
398 longitudinal force applied to a plantarflexed foot [102, 103]:1826, which is particularly  
399 pronounced in barefoot populations [30, 35, 84, 85, 104]. Bone alterations resulting from  
400 these biomechanical stresses might be the source of the higher length to width ratios in  
401 shock-absorbing tarsals observed in this study. We posit that females may have navigated  
402 a wider range of terrains than males (given their preference for shell tools), might have  
403 foraged at greater distances for raw materials (for tools, plant-based medicines, or  
404 textiles), or engaged in faster walking and running speeds to cover greater distances.  
405 Future avenues of research might be to examine the tubers and spurs on the calcaneus to  
406 identify possible differences in locomotion versus weight-bearing activities [27, 33].

407

## 408 **5.2 Foot Lateralization**

409 Despite evidence suggesting footedness would not be visible [38, there was  
410 bioarchaeological evidence suggesting lateralization in the lower limbs that may have  
411 affected the tarsals. In particular, males had greater DJD on the left with knees and hips  
412 implicated while females had greater DJD on the right {Smith, 2008 #5573}. These  
413 lateral patterns did not translate to differences in the tarsals bones but possible other areas

414 to consider in future studies would be the hallux due to its involvement in the extreme  
415 plantarflexion associated with barefoot locomotion [85].

416

### 417 **5.3 Carpal Variation**

418 We postulated there might be between-sex differences in carpal bones due to increased  
419 hand trauma in females [83] and cervical vertebra DJD possibly linked to food and textile  
420 processing activities [72, 74, 83] compared to increased DJD in males [78]. We found  
421 evidence to support activity-based variation between the sexes—females had higher mean  
422 ratios and greater variation than males. These differences cannot be explained by biology  
423 and sexual dimorphism because an analysis of modern humans suggests, that despite  
424 anatomical differences in wrist function and rotation, between-sex variation in carpal  
425 bones is attributable entirely to relative size which can be accounted for through scaling  
426 procedures [105], as we have done. The larger size in females is further evidence that this  
427 defies the pattern expected due to male-female size differences. In all but the capitate, the  
428 range of female values contains all male values and female ratio means exceed males in  
429 all but the hamate.

430

431 Does the extreme variation in female carpal bone sizes may reflect inter-individual  
432 differences in activity intensity or workloads compared to males? This interpretation is  
433 challenging to other studies that have argued for a shared activity load. As reviewed  
434 previously, cultures in which male contributions to diet dominate tend to emphasize  
435 female labor in domains other than diet (e.g., weaving, cordage) [42]. Perhaps females  
436 were previously engaged in many non-subsistence domestic tasks during the Paleoindian  
437 period, which was characterized by big game hunting [66]. Then, the climate change in  
438 the Early Archaic undermined male contributions to diet as megafauna migrated north  
439 [67, 82] and female activities (including a return to intense foraging) dominated.

440

441 The absence of stone tools as grave goods is highly uncharacteristic in societies that value  
442 male hunting contributions and the emphasis at Windover on artifacts typically associated  
443 with female labor (e.g., medicine preparation, containers for carrying goods, decorative  
444 items, textiles) lend support to this [74]. Males were associated with tools that suggest  
445 their involvement in this domestic labor and activity reconstructions suggest a heavy  
446 overlap between the sexes in labor [75-78, 86] but there is also evidence for sex-based  
447 division of labor (males and big game hunting, females and plant-based medicine).

448 Indeed, the Windover population is characterized by obvious skeletal markers for health  
449 care (e.g., post-fracture bone alignment, surviving childhood stressors) [77, 81, 83] and  
450 this care was likely provided by females. Further, the sex-based preference for tool  
451 materials suggests a gendered ideology surrounding tasks [75]. While we cannot infer too  
452 deeply from the site because it is a mortuary pond and only reflects internment ritual, we  
453 can argue that our findings muddy the water a little in terms of the shared load model and  
454 point to some increased burden of activity on females, some specialization within females  
455 to specific tasks, or some female specific activities.

456

### 457 **5.4 Hand Lateralization**

458 Our final area of inquiry was lateralization in the carpal bones due to previous research  
459 suggesting that hunter-gatherers exhibited strong handedness when engaged in complex

460 tasks [47, 49, 50]. The complex tool kit at Windover would have provided an avenue for  
461 handedness to be archaeological visible but, neither male nor female carpal bones  
462 exhibited significant directional asymmetry. We might have expected some lateralization  
463 in males due to spear-throwing but the DJD and MSM patterns were shared between the  
464 sexes which suggests that males may not have been regularly engaged in spear-throwing,  
465 or perhaps the markers of spear-throwing were offset by changes in other aspects of wrist  
466 anatomy [106]:238. A previous study on a population with clear handedness identified  
467 only two bones exhibiting directional asymmetry, the lunate and trapezium [107] which  
468 suggests handedness is not likely to be archaeologically visible.

469

## 470 **6. CONCLUSION**

471

472 Windover females exhibit greater variation (Supplementary Table 4) in seven out of 10  
473 ratio variables and larger means in eight out of ten variables. Clearly, this is not expected  
474 were sexual dimorphism were to have influenced the results despite our data  
475 transformations to mitigate this effect. Thus, we argue that the observed patterns (in both  
476 descriptive data and statistical tests) indicate marking of the female body by activity more  
477 so than marking of the male body. A previous study found that Windover females  
478 experienced worse health than males [77, 81] and this might be related to their heavier  
479 burden of labor. Even if grave goods suggests a shared load, a few sex-based patterns  
480 exist with males still associated with big game hunting and females associated with  
481 medicine. Further, the raw material for tools is partitioned by sex and would differentiate  
482 mobility patterns associated with acquiring tool materials. In addition, females are found  
483 exclusively with containers and may have dominated container production (including  
484 acquisition of raw materials) or used containers to transport resources to the habitation  
485 site—yet to be identified in the archaeological record.

486

487 While we might have expected some hand [49, 50] and possibly some foot lateralization  
488 [36, 37], we did not find it even if DJD and MSM patterns suggesting there might be  
489 some. The lack evidence for footedness was expected due its minimal impact on walking  
490 gait [38]. The lack of evidence for handedness is unexpected since modern ethnographic  
491 studies on hunter-gatherers have shown strong handedness during tool and goods  
492 manufacture [49, 50]. But, handedness in these populations overall have been found to be  
493 much less pronounced when compared to modern industrial societies [49]. Although  
494 some archaeologists are concerned by the ‘tyranny of ethnography’ (Wobst 1978), we  
495 believe predictions about behavior are an essential part of investigating archaeological  
496 populations. Certainly, as demonstrated in this paper, some aspects of behavior are more  
497 archaeologically visible than others.

498

499 Overall, we can conclude that lateralization in the wrist and foot is not archaeologically  
500 visible in this population. Further, we conclude that previous assessments of the high  
501 value placed on female labor at Windover [74] is embodied and potentially reflects an  
502 asymmetric workload or retention of some sex-based activities. Ultimately, the Windover  
503 females tell a much more interesting bioarchaeological story than the males.

504 **ACKNOWLEDGEMENTS**

505 We wish to acknowledge Dr. Frank L. Williams (Georgia State University) for  
506 suggesting the frame of the study.

507

508 **FUNDING STATEMENT**

509 This research did not receive any specific grant from funding agencies in the public,  
510 commercial, or not-for-profit sectors.

511

512

**7. REFERENCES**

513

514 1. Frayer DW, Wolpoff MH. Sexual Dimorphism. Annual Review of Anthropology.  
515 1985;14(1):429-73. doi: 10.1146/annurev.an.14.100185.002241.

516 2. Frayer DW. Sexual dimorphism and cultural evolution in the Late Pleistocene and  
517 Holocene of Europe. J Hum Evol. 1980;9(5):399-415. doi: [https://doi.org/10.1016/0047-](https://doi.org/10.1016/0047-2484(80)90050-0)  
518 [2484\(80\)90050-0](https://doi.org/10.1016/0047-2484(80)90050-0).

519 3. Ruff C, Holt B, Trinkaus E. Who's afraid of the big bad Wolff?: "Wolff's law"  
520 and bone functional adaptation. Am J Phys Anthropol. 2006;129(4):484-98. doi:  
521 10.1002/ajpa.20371.

522 4. Ruff CB. Structural allometry of the femur and tibia in Hominoidea and Macaca.  
523 Folia Primatol. 1987;48:9-49.

524 5. Schaffler MB, Burr DB, Jungers WL, Ruff CB. Structural and mechanical  
525 indicators of limb specialization in primates. Folia Primatologic. 1985;45:61-75.

526 6. Ruff CB. Sexual dimorphism in human lower limb bone structure: relationship to  
527 subsistence strategy and sexual division of labor. J Hum Evol. 1987;16:391-416.

528 7. Bridges PS. Skeletal biology and behavior in ancient humans. Evolutionary  
529 Anthropology: Issues, News, and Reviews. 1995;4(4):112-20. doi:  
530 10.1002/evan.1360040403.

531 8. Bridges PS. Changes in activities with the shift to agriculture in the Southeastern  
532 United States. Current Anthropology. 1989;30:385-94.

533 9. Eshed V, Gopher A, Galili E, Hershkovitz I. Musculoskeletal stress markers in  
534 Natufian hunter-gatherers and Neolithic farmers in the Levant: The upper limb. Am J  
535 Phys Anthropol. 2004;123(4):303-15. doi: 10.1002/ajpa.10312.

536 10. Berbesque JC, Marlowe FW, Pawn I, Thompson P, Johnson G, Mabulla A. Sex  
537 differences in Hadza hunter-gatherer dental wear: A preliminary report. . Human Nature.  
538 2012; 23:270-82. doi: 10.1007/s12110-012-9145-9.

539 11. Estalrriich A, Rosas A. Division of labor by sex and age in Neandertals: an  
540 approach through the study of activity-related dental wear. J Hum Evol. 2015;80:51-63.

- 541 12. Binford LR. Willow Smoke and Dogs' Tails: Hunter-Gatherer Settlement  
542 Systems and Archaeological Site Formation. *American Antiquity*. 1980;45(1):4-20. doi:  
543 10.2307/279653.
- 544 13. Kelly RL. Hunter-gatherer mobility strategies. *Journal of Anthropological*  
545 *Research*. 1983;39(3):277-306. doi: 10.1086/jar.39.3.3629672.
- 546 14. Sahlins MD. Notes on the original affluent society. In: Lee RB, DeVore I, editors.  
547 *Man the Hunter*. Chicago: Aldine; 1968. p. 85-9.
- 548 15. Marlowe FW. Hunter-gatherers and human evolution. *Evol Anthr*. 2005;14:54-67.
- 549 16. Panter-Brick C. Sexual division of labor: energetic and evolutionary scenarios.  
550 *Am J Hum Biol*. 2002;14(5):627-40.
- 551 17. Raichlen DA, Pontzer H, Harris JA, Mabulla AZP, Marlowe FW, Josh Snodgrass  
552 J, et al. Physical activity patterns and biomarkers of cardiovascular disease risk in hunter-  
553 gatherers. *Am J Hum Biol*. 2017;29(2):e22919-n/a. doi: 10.1002/ajhb.22919.
- 554 18. Berbesque JC, Wood BM, Crittenden AN, Mabulla A, Marlowe FW. Eat first,  
555 share later: Hadza hunter-gatherer men consume more while foraging than in central  
556 places. *Evolution and Human Behavior*. 2016;37(4):281-6. doi:  
557 <https://doi.org/10.1016/j.evolhumbehav.2016.01.003>.
- 558 19. Shaw CN, Stock JT. Intensity, repetitiveness, and directionality of habitual  
559 adolescent mobility patterns influence the tibial diaphysis morphology of athletes. *Am J*  
560 *Phys Anthropol*. 2009;140(1):149-59. doi: 10.1002/ajpa.21064.
- 561 20. Ruff CB. Body size, body shape, and long bone strength in modern humans. *J*  
562 *Hum Evol*. 2000;38(2):269-90. doi: <https://doi.org/10.1006/jhev.1999.0322>.
- 563 21. Pearson Osbjorn M. Activity, Climate, and Postcranial Robusticity: Implications  
564 for Modern Human Origins and Scenarios of Adaptive Change. *Current Anthropology*.  
565 2000;41(4):569-607. doi: 10.1086/317382.
- 566 22. Bridges PS. Degenerative joint disease in hunter-gatherers and agriculturalists  
567 from the Southeastern United States. *Am J Phys Anthropol*. 1991;85(4):379-91. doi:  
568 10.1002/ajpa.1330850403.
- 569 23. Malina RM, Little BB. Physical activity: The present in the context of the past.  
570 *Am J Hum Biol*. 2008;20(4):373-91. doi: 10.1002/ajhb.20772.
- 571 24. Stock JT. Hunter-gatherer postcranial robusticity relative to patterns of mobility,  
572 climatic adaptation, and selection for tissue economy. *Am J Phys Anthropol*.  
573 2006;131(2):194-204. doi: 10.1002/ajpa.20398.

- 574 25. Carlson KJ, Grine FE, Pearson OM. Robusticity and sexual dimorphism in the  
575 postcranium of modern hunter-gatherers from Australia. *Am J Phys Anthropol.*  
576 2007;134(1):9-23. doi: 10.1002/ajpa.20617.
- 577 26. Venkataraman VV, Kraft TS, Desilva JM, Dominy NJ. Phenotypic plasticity of  
578 climbing-related traits in the ankle joint of great apes and rainforest hunter-gatherers.  
579 *Hum Biol.* 2013;85(1-3):309-28. doi: 10.3378/027.085.0315.
- 580 27. Weiss E. Calcaneal spurs: Examining etiology using prehistoric skeletal remains  
581 to understand present day heel pain. *The Foot.* 2012;22(3):125-9. doi:  
582 <https://doi.org/10.1016/j.foot.2012.04.003>.
- 583 28. Lieverse AR, Weber AW, Bazaliiskiy VI, Goriunova OI, Savel'ev NA.  
584 Osteoarthritis in Siberia's Cis-Baikal: Skeletal indicators of hunter-gatherer adaptation  
585 and cultural change. *Am J Phys Anthropol.* 2007;132(1):1-16. doi: 10.1002/ajpa.20479.
- 586 29. Ruff C. Sexual dimorphism in human lower limb bone structure: relationship to  
587 subsistence strategy and sexual division of labor. *J Hum Evol.* 1987;16(5):391-416. doi:  
588 [https://doi.org/10.1016/0047-2484\(87\)90069-8](https://doi.org/10.1016/0047-2484(87)90069-8).
- 589 30. Pontzer H, Suchman K, Raichlen DA, Wood BM, Mabulla AZP, Marlowe FW.  
590 Foot strike patterns and hind limb joint angles during running in Hadza hunter-gatherers.  
591 *Journal of Sport and Health Science.* 2014;3(2):95-101. doi:  
592 <https://doi.org/10.1016/j.jshs.2014.03.010>.
- 593 31. Trinkaus E, Shang H. Anatomical evidence for the antiquity of human footwear.  
594 *Journal of Archaeological Science.* 2008;35:1928–33.
- 595 32. Nordin M, Frankel VH. *Basic Biomechanics of the Musculoskeletal System.* 4th  
596 ed. Baltimore, MD: Lippincott Williams & Wilkins; 2012.
- 597 33. Raichlen DA, Armstrong H, Lieberman DE. Calcaneus length determines running  
598 economy: Implications for endurance running performance in modern humans and  
599 Neandertals. *J Hum Evol.* 2011;60(3):299-308. doi:  
600 <https://doi.org/10.1016/j.jhevol.2010.11.002>.
- 601 34. Hatala KG, Dingwall HL, Wunderlich RE, Richmond BG. Variation in Foot  
602 Strike Patterns during Running among Habitually Barefoot Populations. *PLoS One.*  
603 2013;8(1):e52548. doi: 10.1371/journal.pone.0052548.
- 604 35. Fredericks W, Swank S, Teisberg M, Hampton B, Ridpath L, Hanna JB. Lower  
605 Extremity Biomechanical Relationships with Different Speeds in Traditional, Minimalist,  
606 and Barefoot Footwear. *J Sports Sci Med.* 2015;14(2):276-83.
- 607 36. Gabbard C. Foot Laterality in Children, Adolescents, and Adults. *Laterality:*  
608 *Asymmetries of Body, Brain and Cognition.* 1996;1(3):199-206. doi:  
609 10.1080/713754236.



- 610 37. Gentry V, Gabbard C. Foot-Preference Behavior: A Developmental Perspective.  
611 The Journal of General Psychology. 1995;122(1):37-45. doi:  
612 10.1080/00221309.1995.9921220.
- 613 38. Zverev YP. Spatial parameters of walking gait and footedness. Ann Hum Biol.  
614 2006;33(2):161-76. doi: 10.1080/03014460500500222.
- 615 39. Hiatt B. Woman the gatherer. In: Gale F, editor. Woman's Role in an Aboriginal  
616 Society. Canberra: Australian Institute of Aboriginal Studies; 1978. p. 4-15.
- 617 40. Bailey H. A method of determining warmth and temperateness of climate.  
618 Geografiska Annaler. 1960;43:1-16.
- 619 41. Marlowe FW. Hunting and gathering: The human sexual division of foraging  
620 labor. Cross-Cultural Research. 2007;41(2):170-95.
- 621 42. Waguespack N. The organization of male and female labor in foraging societies:  
622 Implications for early Paleoindian archaeology. American Anthropologist. 2005;107:666-  
623 76.
- 624 43. Bentley GR. Hunter-Gatherer Energetics and Fertility: A Reassessment of the  
625 !kung San. Hum Ecol. 1985;13(1):79-109.
- 626 44. Cowlishaw G. The determinants of fertility among Australian Aborigines.  
627 Mankind. 1981;13(1):37-55.
- 628 45. Hurtado A, Hawkes K, Hill K, Kaplan H. Female subsistence strategies among  
629 Ache hunter-gatherers of Eastern Paraguay. Hum Ecol. 1985;13(1):1-28.
- 630 46. Trinkaus E. Neandertal postcrania and the adaptive shift to modern humans. In:  
631 Trinkaus E, editor. The Mousterian legacy: Human biocultural changes in the Upper  
632 Pleistocene. 164. Oxford: British Archaeological Reports International Series; 1983. p.  
633 165-200.
- 634 47. Stock JT, Shirley MK, Sarringhaus LA, Davies TG, Shaw CN. Skeletal evidence  
635 for variable patterns of handedness in chimpanzees, human hunter-gatherers, and recent  
636 British populations. Ann N Y Acad Sci. 2013;1288:86-99. doi: 10.1111/nyas.12067.
- 637 48. Weiss E. Sex differences in humeral bilateral asymmetry in two hunter-gatherer  
638 populations: California Amerinds and British Columbian Amerinds. Am J Phys  
639 Anthropol. 2009;140(1):19-24. doi: 10.1002/ajpa.21025.
- 640 49. Cavanagh T, Berbesque JC, Wood B, Marlowe F. Hadza handedness: Lateralized  
641 behaviors in a contemporary hunter-gatherer population. Evolution and Human Behavior.  
642 2016;37:202-9. doi: <http://dx.doi.org/10.1016/j.evolhumbehav.2015.11.002>.
- 643 50. Robira B, Pouydebat E, San-Galli A, Meulman EJM, Aubaile F, Breuer T, et al.  
644 Handedness in gestural and manipulative actions in male hunter-gatherer Aka pygmies

- 645 from Central African Republic. *Am J Phys Anthropol.* 2018;10.1002/ajpa.23435:n/a-n/a.  
646 doi: 10.1002/ajpa.23435.
- 647 51. Bridges PS. Vertebral arthritis and physical activities in the prehistoric  
648 southeastern United States. *Am J Phys Anthropol.* 1994;93:83-93.
- 649 52. Bostanci E. A Biometrical and Morphological Study of the Astragalus and  
650 Calcaneus of the Roman People of Gordium in Anatolia: An Introduction to the  
651 Evolution of the Human Foot. Ankara: Turk Tarih Kurumu Basimevi; 1962.
- 652 53. Bunning P. Some observations on the West African calcaneus and the associated  
653 talo-calceaneal interosseous ligamentous apparatus. *Am J Phys Anthropol.* 1964;37:373-  
654 88.
- 655 54. Steele DG, McKern TW. A method for assessment of maximum long bone length  
656 and living stature from fragmentary long bones. *Am J Phys Anthropol.* 1969;31:215-28.
- 657 55. Steele D. The estimation of sex on the basis of the talus and calcaneus. *Am J*  
658 *Phys Anthropol.* 1976;45:581-8.
- 659 56. Steele D. The talus and calcaneus: discriminant functions for estimation of sex  
660 among American Whites and Negroes. Lawrence: University of Kansas; 1970.
- 661 57. Harris SM, Case DT. Sexual Dimorphism in the Tarsal Bones: Implications for  
662 Sex Determination. *J Forensic Sci.* 2012;57(2):295-305. doi: 10.1111/j.1556-  
663 4029.2011.02004.x.
- 664 58. Riepert T, Drechsler T, Schild H, Nafe B, Mattern R. Estimation of sex on the  
665 basis of radiographs of the calcaneus. *Forensic Sci Int.* 1996;77(3):133-40.
- 666 59. Mastrangelo P, De Luca S, Sanchez-Mejorada G. Sex assessment from carpals  
667 bones: Discriminant function analysis in a contemporary Mexican sample. *Forensic Sci*  
668 *Int.* 2011;209(1-3):196.e1-.e15.
- 669 60. Mastrangelo P, Luca S, Alemán I, Botella M. Sex assessment from the carpals  
670 bones: Discriminant function analysis in a 20th century Spanish sample. *Forensic Sci Int.*  
671 2011;206(1-3):216.e1-.e10.
- 672 61. Kidd RS, Oxnard CE. Patterns of morphological discrimination in selected human  
673 tarsal elements. *Am J Phys Anthropol.* 2002;117(2):169-81. doi: 10.1002/ajpa.20017.
- 674 62. Gualdi-Russo E. Sex determination from the talus and calcaneus measurements.  
675 *Forensic Sci Int.* 2007;171(2):151-6. doi: <https://doi.org/10.1016/j.forsciint.2006.10.014>.
- 676 63. Introna F, Jr., Di Vella G, Campobasso CP, Dragone M. Sex determination by  
677 discriminant analysis of calcanei measurements. *J Forensic Sci.* 1997;42(4):725-8.

- 678 64. Hoover K. Carpals and Tarsals: Discriminant Functions for the Estimation of Sex.  
679 Tallahassee: The Florida State University; 1997.
- 680 65. Davies CM, Hackman L, Black SM. The foot in forensic human identification – A  
681 review. *The Foot*. 2014;24(1):31-6. doi: <https://doi.org/10.1016/j.foot.2013.12.001>.
- 682 66. Milanich JT. *Archaeology of Precolumbian Florida*. Gainesville, Florida: The  
683 University Press of Florida; 1994.
- 684 67. Halligan JJ, Waters MR, Perrotti A, Owens IJ, Feinberg JM, Bourne MD, et al.  
685 Pre-Clovis occupation 14,550 years ago at the Page-Ladson site, Florida, and the  
686 peopling of the Americas. *Science Advances*. 2016;2(5). doi: 10.1126/sciadv.1600375.
- 687 68. Doran GH, Dickel DN. Radiometric chronology at the Archaic Windover Site.  
688 *Florida Anthropologist*. 1988;41:365-80.
- 689 69. Purdy B. *The Art and Archaeology of Florida's Wetlands*. Boca Raton: CRC  
690 Press; 1991.
- 691 70. Hauswirth WW, Dickel CD, Lawlor DA. DNA analysis of the Windover  
692 population. In: Herrmann B, Hummel S, editors. *Ancient DNA: Recovery and Analysis*  
693 *of Genetic Material from Paleontological, Archaeological, Museum, Medical, and*  
694 *Forensic Specimens*: Springer; 1994. p. 104-21.
- 695 71. Tuross N, Fogel ML, Newsom L, Doran GH. Subsistence in the Florida Archaic:  
696 The Stable-Isotope and Archaeobotanical Evidence from the Windover Site. *American*  
697 *Antiquity*. 1994;59(2):288-303. doi: 10.2307/281933.
- 698 72. Adovasio JM, Andrews RL, Hyland DC, Illingworth JS. Perishable industries  
699 from the Windover Bog: An unexpected window into the Florida Archaic. *North*  
700 *American Archaeologist*. 2001;22(1):1-90. doi: [https://doi.org/10.2190/BX11-VDQY-](https://doi.org/10.2190/BX11-VDQY-LG5N-P94F)  
701 [LG5N-P94F](https://doi.org/10.2190/BX11-VDQY-LG5N-P94F).
- 702 73. Klinge D. *Burial in Florida: Culture, Ritual, Health, and Status: The Archaic to*  
703 *Seminole Periods*. Tallahassee, Florida: The Florida State University; 2006.
- 704 74. Adovasio JM, Soffer O, Page J. *The Invisible Sex: Uncovering the True Roles of*  
705 *Women in Prehistory*. New York City: Harper-Collins e-books; 2009.
- 706 75. Hamlin C. Sharing the load: Gender and task division at the Windover Site. In:  
707 Arnold B, Wicker NL, editors. *Gender and the Archaeology of Death*. AltaMira Press:  
708 Lanham, Maryland; 2001.
- 709 76. Smith RK. *The Analysis of Skeletal Fractures From Windover (8Br246) and*  
710 *Their Inference Regarding Lifestyle*. Tallahassee, Florida: The Florida State University;  
711 2003.

- 712 77. Wentz RK. A Bioarchaeological Assessment of Health from Florida's Archaic:  
713 Application of the Western Hemisphere Health Index to the Remains from Windover  
714 (8Br246). Tallahassee, FL: The Florida State University; 2006.
- 715 78. Smith HM. Degenerative Joint Disease in the Windover Population. Tallahassee,  
716 Florida: The Florida State University; 2008.
- 717 79. Berbesque JC, Doran GH. Brief communication: physiological stress in the  
718 Florida Archaic-enamel hypoplasia and patterns of developmental insult in early North  
719 American hunter-gatherers. *Am J Phys Anthropol.* 2008;136(3):351-6. doi:  
720 10.1002/ajpa.20816.
- 721 80. Berbesque JC, Hoover KC. Frequency and developmental timing of linear enamel  
722 hypoplasia defects in Early Archaic Texan hunter-gatherers. *PeerJ.* 2018;6:e4367. doi:  
723 10.7717/peerj.4367.
- 724 81. Wentz RK, Tucker B, Krigbaum J, Doran GH. Gauging differential health among  
725 the sexes at Windover (8BR246) using the Western Hemisphere Health Index. *Mem Inst*  
726 *Oswaldo Cruz, Rio de Janeiro.* 2006;101(II):77-83.
- 727 82. Doran G, Dickel D. Multidisciplinary investigations at the Windover Site. In:  
728 Purdy B, editor. *Wet Site Archaeology.* Caldwell: Telford Press; 1988.
- 729 83. Wentz RK. Patterns of degenerative joint disease among males and females at  
730 Windover (8BR246) and their relationship to grave goods. *The Florida Anthropologist.*  
731 2010;32(1):6-10.
- 732 84. Hollander K, de Villiers JE, Sehner S, Wegscheider K, Braumann K-M, Venter R,  
733 et al. Growing-up (habitually) barefoot influences the development of foot and arch  
734 morphology in children and adolescents. *Sci Rep.* 2017;7:8079. doi: 10.1038/s41598-  
735 017-07868-4.
- 736 85. Franklin S, Grey MJ, Heneghan N, Bowen L, Li F-X. Barefoot vs common  
737 footwear: A systematic review of the kinematic, kinetic and muscle activity differences  
738 during walking. *Gait Posture.* 2015;42(3):230-9. doi: 10.1016/j.gaitpost.2015.05.019.
- 739 86. Hagaman K. Activity-Induced Musculoskeletal Stress Marker Analysis of the  
740 Windover Population. Tallahassee, FL: The Florida State University; 2009.
- 741 87. Fairbairn DJ. Allometry for Sexual Size Dimorphism: Pattern and Process in the  
742 Coevolution of Body Size in Males and Females. *Annu Rev Ecol Syst.* 1997;28(1):659-  
743 87. doi: 10.1146/annurev.ecolsys.28.1.659.
- 744 88. Smith RJ, Cheverud JM. Scaling of sexual dimorphism in body mass: A  
745 phylogenetic analysis of Rensch's Rule in primates. *Int J Primatol.* 2002;23(5):1095-135.

- 746 89. Jungers WL. Aspects of size and scaling in primate biology with special reference  
747 to the locomotor skeleton. *Am J Phys Anthropol.* 1984;27(S5):73-97. doi:  
748 10.1002/ajpa.1330270505.
- 749 90. Lewontin RC. On the measurement of relative variability. *Syst Zool.*  
750 1966;15(2):141-2.
- 751 91. Huxley JS, Tessier G. Terminology of relative growth. *Nat Biotechnol.*  
752 1936;137:780-1.
- 753 92. Mobb GE, Wood BA. Allometry and sexual dimorphism in the primate  
754 innominate bone. *Am J Anat.* 1977;150:530-8.
- 755 93. Jungers WL, Falsetti AB, Wall CE. Shape, relative size, and size-adjustments in  
756 morphometrics. *Yearbook of Physical Anthropology.* 1995;38:137-61.
- 757 94. Palmer AR. Fluctuating Asymmetry Analyses: A Primer. In: Markow TA, editor.  
758 *Developmental Instability: Its Origins and Evolutionary Implications.* Dordrecht,  
759 Netherlands: Kluwer; 1994. p. 335-64.
- 760 95. Palmer AR, Strobeck C. Fluctuating asymmetry analysis revisited. In: Polak M,  
761 editor. *Developmental Instability (DI): Causes and Consequences.* Oxford: Oxford  
762 University Press; 2003. p. 279-319.
- 763 96. Palmer AR, Strobeck C. Fluctuating asymmetry: measurement, analysis, patterns.  
764 *Annu Rev Ecol Syst.* 1986;17:391-421.
- 765 97. Sokal RR, Rohlf FJ. *Biometry: The Principles and Practice of Statistics in*  
766 *Biological Research.* 3rd ed. New York: W.H. Freeman and Company; 1995.
- 767 98. Coris EE, Lombardo JA. Tarsal navicular stress fractures. *Am Fam Physician.*  
768 2003;67(1):85-90.
- 769 99. Khan KM, Brukner PD, Kearney C, Fuller PJ, Bradshaw CJ, Kiss ZS. Tarsal  
770 navicular stress fracture in athletes. *Sports Med.* 1994;17(1):65-76.
- 771 100. de Clercq PF, Bevernage BD, Leemrijse T. Stress fracture of the navicular bone.  
772 *Acta Orthop Belg.* 2008;74(6):725-34.
- 773 101. Shakked RJ, Walters EE, O'Malley MJ. Tarsal navicular stress fractures. *Curr Rev*  
774 *Musculoskelet Med.* 2017;10:122-30.
- 775 102. Liu GT, Lavery LA, Schenck RC, Lanctot DR, Zhu CF, Athanasiou KA. Human  
776 articular cartilage biomechanics of the second metatarsal intermediate cuneiform joint.  
777 *The Journal of Foot and Ankle Surgery.* 1997;36(5):367-74. doi:  
778 [https://doi.org/10.1016/S1067-2516\(97\)80039-7](https://doi.org/10.1016/S1067-2516(97)80039-7).

- 779 103. Rodgers MM. Dynamic biomechanics of the normal foot and ankle during  
780 walking and running. *Phys Ther.* 1988;68(12):1822-30.
- 781 104. Hollander K, van der Zwaard BC, de Villiers JE, Braumann K-M, Venter R, Zech  
782 A. The effects of being habitually barefoot on foot mechanics and motor performance in  
783 children and adolescents aged 6–18 years: study protocol for a multicenter cross-sectional  
784 study (Barefoot LIFE project). *Journal of Foot and Ankle Research.* 2016;9(1):36. doi:  
785 [10.1186/s13047-016-0166-1](https://doi.org/10.1186/s13047-016-0166-1).
- 786 105. Crisco JJ, Coburn JC, Moore DC, Upal MA. Carpal bone size and scaling in men  
787 versus in women. *The Journal of Hand Surgery.* 2005;30(1):35-42. doi:  
788 <https://doi.org/10.1016/j.jhsa.2004.08.012>.
- 789 106. Maki JM. *The Biomechanics of Spear Throwing: An Analysis of the Effects of*  
790 *Anatomical Variation on Throwing Performance, with Implications for the Fossil Record.*  
791 *St. Louis: Washington University in St. Louis; 2013.*
- 792 107. Reina N, Cavaignac E, Trousdale WH, Laffosse JM, Braga J. Laterality and grip  
793 strength influence hand bone micro-architecture in modern humans, an HRpQCT study. *J*  
794 *Anat.* 2017;230(6):796-804.  
795
